# Supplementary material
Source: HighWire-hosted journal article supplement (https://drc.bmj.com/content/suppl/2020/11/30/8.2.e001753)
Supplement: bmjdrc-2020-001753supp001_data_supplement.pdf [file bmjdrc-2020-001753supp001_data_supplement.pdf]

**Table S1. Characteristics of Participants by Quartiles of SD of Fasting Plasma Glucose in The Look AHEAD Study**

|                                         | Entire Sample<br>N=3560 | Quartiles of SD of Fasting Plasma Glucose, mg/Dl |                           |                           |                       | P Value |
|-----------------------------------------|-------------------------|--------------------------------------------------|---------------------------|---------------------------|-----------------------|---------|
|                                         |                         | Q1 (< 10.15)<br>N=892                            | Q2 (10.15-17.53)<br>N=888 | Q3 (17.53-29.80)<br>N=890 | Q4 (> 29.80)<br>N=890 |         |
| <b>At Baseline</b>                      |                         |                                                  |                           |                           |                       |         |
| Age, years                              | 58.4 (6.7)              | 59.2 (6.7)                                       | 59.1 (6.7)                | 58.2 (6.5)                | 57.1 (6.6)            | <0.001  |
| Women, %                                | 62.1                    | 63.5                                             | 59.6                      | 62.4                      | 62.9                  | 0.336   |
| Randomization arm, %                    |                         |                                                  |                           |                           |                       | 0.336   |
| Diabetes support and education          | 48.9                    | 49.1                                             | 47.6                      | 47.5                      | 51.4                  |         |
| Intensive lifestyle intervention        | 51.1                    | 50.9                                             | 52.4                      | 52.5                      | 48.6                  |         |
| Race/ethnicity, %                       |                         |                                                  |                           |                           |                       | 0.019   |
| White                                   | 67.0                    | 66.6                                             | 69.5                      | 67.5                      | 64.4                  |         |
| Non-Hispanic Black                      | 17.1                    | 16.6                                             | 16.6                      | 17.8                      | 17.3                  |         |
| Hispanic                                | 12.6                    | 12.4                                             | 10.6                      | 11.2                      | 16.0                  |         |
| Body mass index, kg/m <sup>2</sup>      | 36.0 (5.9)              | 35.3 (5.9)                                       | 35.7 (5.8)                | 36.2 (5.8)                | 36.9 (6.0)            | <0.001  |
| Current smoking, %                      | 3.7                     | 2.9                                              | 3.6                       | 3.2                       | 4.9                   | 0.100   |
| Alcohol drinking, %                     | 33.4                    | 34.5                                             | 33.5                      | 34.3                      | 31.2                  | 0.442   |
| Use of antihypertensive medication, %   | 70.9                    | 72.3                                             | 69.8                      | 71.2                      | 70.3                  | 0.672   |
| Duration of diabetes, years             | 5.0 (2.0-9.0)           | 3.0 (1.0-6.0)                                    | 4.0 (2.0-8.0)             | 5.0 (3.0-10.0)            | 7.0 (3.0-11.0)        | <0.001  |
| eGFR, mL/min/1.73m <sup>2</sup>         | 90.9 (15.7)             | 89.8 (15.4)                                      | 89.7 (15.6)               | 91.2 (15.7)               | 93.0 (16.1)           | <0.001  |
| <b>During Follow-up</b>                 |                         |                                                  |                           |                           |                       |         |
| Average systolic blood pressure, mm Hg  | 125.6 (13.9)            | 123.1 (13.2)                                     | 125.9 (13.5)              | 126.6 (14.0)              | 126.7 (14.6)          | <0.001  |
| Average diastolic blood pressure, mm Hg | 68.4 (8.0)              | 67.7 (8.0)                                       | 68.8 (7.9)                | 68.6 (7.9)                | 68.7 (8.1)            | 0.0121  |
| Average total-to-HDL cholesterol ratio  | 4.2 (1.2)               | 4.1 (1.1)                                        | 4.1 (1.0)                 | 4.3 (1.3)                 | 4.5 (1.2)             | <0.001  |
| Fasting plasma glucose, mg/dL           |                         |                                                  |                           |                           |                       |         |
| Baseline fasting plasma glucose, mg/dL  | 151.4 (44.5)            | 123.9 (21.4)                                     | 137.8 (24.2)              | 154.4 (33.9)              | 189.6 (57.6)          | <0.001  |
| 12-month fasting plasma glucose, mg/dL  | 136.4 (41.7)            | 119.7 (22.9)                                     | 127.3 (26.4)              | 137.9 (35.1)              | 160.6 (59.5)          | <0.001  |
| 24-month fasting plasma glucose, mg/dL  | 140.0 (45.0)            | 120.5 (22.3)                                     | 129.5 (26.4)              | 140.4 (35.7)              | 169.7 (65.4)          | <0.001  |
| 36-month fasting plasma glucose, mg/dL  | 142.3 (45.6)            | 122.3 (22.3)                                     | 132.1 (26.1)              | 143.9 (35.7)              | 170.8 (67.4)          | <0.001  |
| Average fasting plasma glucose, mg/dL   | 142.5 (33.9)            | 121.6 (21.2)                                     | 131.7 (22.1)              | 144.1 (27.2)              | 172.7 (38.1)          | <0.001  |
| Hemoglobin A <sub>1C</sub> , %          |                         |                                                  |                           |                           |                       |         |
| Baseline hemoglobin A <sub>1C</sub> , % | 7.2 (1.1)               | 6.5 (0.7)                                        | 6.9 (0.8)                 | 7.3 (0.9)                 | 8.1 (1.3)             | <0.001  |
| 12-month hemoglobin A <sub>1C</sub> , % | 6.8 (1.1)               | 6.3 (0.7)                                        | 6.5 (0.8)                 | 6.8 (1.0)                 | 7.6 (1.4)             | <0.001  |
| 24-month hemoglobin A <sub>1C</sub> , % | 6.9 (1.3)               | 6.3 (0.7)                                        | 6.6 (0.9)                 | 7.0 (1.0)                 | 7.9 (1.6)             | <0.001  |
| 36-month hemoglobin A <sub>1C</sub> , % | 7.0 (1.3)               | 6.3 (0.8)                                        | 6.6 (0.8)                 | 7.0 (1.1)                 | 8.0 (1.7)             | <0.001  |
| Average hemoglobin A <sub>1C</sub> , %  | 7.0 (1.0)               | 6.4 (0.7)                                        | 6.7 (0.7)                 | 7.0 (0.8)                 | 7.9 (1.1)             | <0.001  |

Data are mean (SD), median (interquartile range), or number (proportion) as appropriate.

eGFR indicates estimated glomerular filtration rate; HDL, high-density lipoprotein; SD, standard deviation.

**Table S2. Hazard Ratios for Clinical Outcomes by Variation Independent of the Mean of HbA<sub>1C</sub> in the Look AHEAD Study**

| Outcome                           | Quartiles of Variation Independent of the Mean of HbA <sub>1C</sub> , % |                   |                           |                           | <i>P</i> <sub>trend</sub> | Per SD                   |
|-----------------------------------|-------------------------------------------------------------------------|-------------------|---------------------------|---------------------------|---------------------------|--------------------------|
|                                   | Q1 (< 0.091)                                                            | Q2 (0.091-0.139)  | Q3 (0.139-0.203)          | Q4 (> 0.203)              |                           |                          |
| <b>All-Cause Mortality</b>        |                                                                         |                   |                           |                           |                           |                          |
| Model 1                           | Reference                                                               | 0.92 (0.58-1.48)  | 1.24 (0.80-1.94)          | <b>1.68 (1.10-2.58)*</b>  | 0.007                     | <b>1.32 (1.16-1.51)‡</b> |
| Model 2                           | Reference                                                               | 0.94 (0.58-1.50)  | 1.16 (0.73-1.83)          | <b>1.59 (1.02-2.46)*</b>  | 0.023                     | <b>1.31 (1.14-1.50)‡</b> |
| <b>Cardiovascular Mortality</b>   |                                                                         |                   |                           |                           |                           |                          |
| Model 1                           | Reference                                                               | 4.47 (0.97-20.74) | <b>5.55 (1.22-25.16)*</b> | <b>5.83 (1.28-26.59)*</b> | 0.021                     | <b>1.33 (1.01-1.76)*</b> |
| Model 2                           | Reference                                                               | 4.17 (0.89-19.52) | 4.45 (0.97-20.52)         | 4.54 (0.97-21.29)         | 0.076                     | 1.30 (0.94-1.81)         |
| <b>CVD Composite <sup>Δ</sup></b> |                                                                         |                   |                           |                           |                           |                          |
| Model 1                           | Reference                                                               | 1.14 (0.85-1.53)  | 1.02 (0.75-1.39)          | 1.02 (0.74-1.39)          | 0.897                     | 1.00 (0.90-1.12)         |
| Model 2                           | Reference                                                               | 1.09 (0.80-1.47)  | 0.93 (0.68-1.28)          | 0.90 (0.66-1.25)          | 0.374                     | 0.98 (0.87-1.10)         |
| <b>Heart Failure Event</b>        |                                                                         |                   |                           |                           |                           |                          |
| Model 1                           | Reference                                                               | 1.72 (0.84-3.52)  | 2.02 (1.00- 4.07)         | 1.55 (0.74-3.28)          | 0.226                     | 1.08 (0.86-1.35)         |
| Model 2                           | Reference                                                               | 1.56 (0.76-3.23)  | 1.60 (0.78-3.28)          | 1.30 (0.61-2.75)          | 0.562                     | 1.01 (0.80-1.29)         |

Data are hazard ratios (95% confidence intervals) unless otherwise indicated.

<sup>Δ</sup> CVD Composite was as composite of myocardial infarction, hospitalization for angina, stroke and death for cardiovascular causes.

Model 1 adjusted for age, sex, race/ethnicity, and randomization arm. Model 2 includes variables in model 1 with further adjustment for body mass index, current smoking, alcohol drinking, use of antihypertensive medications, average ratio of total to high-density lipoprotein cholesterol, estimated glomerular filtration rate, duration of diabetes and average systolic blood pressure.

AHEAD indicates Action for Health in Diabetes; CVD, cardiovascular disease; HbA<sub>1C</sub>, hemoglobin A<sub>1C</sub>; Q, quartile; SD, standard deviation.

\* *P*<0.05, † *P*<0.01, ‡ *P*<0.001

**Table S3. Hazard Ratios for Clinical Outcomes by Coefficient of Variation of HbA<sub>1C</sub> in the Look AHEAD Study**

| Outcome                           | Quartiles of Coefficient of Variation of HbA <sub>1C</sub> , % |                  |                          |                           | <i>P</i> <sub>trend</sub> | Per SD                   |
|-----------------------------------|----------------------------------------------------------------|------------------|--------------------------|---------------------------|---------------------------|--------------------------|
|                                   | Q1 (< 0.039)                                                   | Q2 (0.039-0.062) | Q3 (0.062-0.096)         | Q4 (> 0.096)              |                           |                          |
| <b>All-Cause Mortality</b>        |                                                                |                  |                          |                           |                           |                          |
| Model 1                           | Reference                                                      | 1.01 (0.62-1.62) | 1.41 (0.89-2.23)         | <b>2.18 (1.41-3.37)‡</b>  | <0.001                    | <b>1.38 (1.22-1.57)‡</b> |
| Model 2                           | Reference                                                      | 0.99 (0.61-1.62) | 1.31 (0.82-2.09)         | <b>1.92 (1.22-3.02)†</b>  | 0.002                     | <b>1.35 (1.18-1.54)‡</b> |
| Model 3                           | Reference                                                      | 0.98 (0.60-1.59) | 1.26 (0.79-2.02)         | <b>1.76 (1.09-2.84)*</b>  | 0.012                     | <b>1.32 (1.14-1.53)‡</b> |
| <b>Cardiovascular Mortality</b>   |                                                                |                  |                          |                           |                           |                          |
| Model 1                           | Reference                                                      | 1.49 (0.42-5.29) | 1.87 (0.54-6.41)         | <b>4.91 (1.62-14.94)†</b> | 0.001                     | <b>1.52 (1.18-1.96)†</b> |
| Model 2                           | Reference                                                      | 1.35 (0.37-4.89) | 1.69 (0.49-5.85)         | <b>3.46 (1.09-10.99)*</b> | 0.020                     | <b>1.47 (1.09-1.99)*</b> |
| Model 3                           | Reference                                                      | 1.31 (0.36-4.77) | 1.61 (0.46-5.63)         | 3.09 (0.92-10.42)         | 0.048                     | <b>1.41 (1.01-1.97)*</b> |
| <b>CVD Composite <sup>Δ</sup></b> |                                                                |                  |                          |                           |                           |                          |
| Model 1                           | Reference                                                      | 1.04 (0.76-1.42) | 1.14 (0.83-1.55)         | 1.36 (1.00-1.84)          | 0.041                     | 1.11 (1.00-1.23)         |
| Model 2                           | Reference                                                      | 0.99 (0.72-1.35) | 1.03 (0.75-1.41)         | 1.13 (0.82-1.55)          | 0.420                     | 1.04 (0.93-1.16)         |
| Model 3                           | Reference                                                      | 0.94 (0.69-1.30) | 0.95 (0.69-1.31)         | 0.94 (0.67-1.32)          | 0.733                     | 0.97 (0.86-1.09)         |
| <b>Heart Failure Event</b>        |                                                                |                  |                          |                           |                           |                          |
| Model 1                           | Reference                                                      | 1.85 (0.85-4.00) | <b>2.47 (1.17-5.22)*</b> | <b>2.49 (1.16-5.34)*</b>  | 0.013                     | <b>1.28 (1.05-1.55)*</b> |
| Model 2                           | Reference                                                      | 1.74 (0.80-3.79) | 1.86 (0.86-3.99)         | 1.76 (0.81-3.83)          | 0.196                     | 1.17 (0.95-1.44)         |
| Model 3                           | Reference                                                      | 1.62 (0.74-3.52) | 1.60 (0.74-3.47)         | 1.25 (0.55-2.83)          | 0.760                     | 1.03 (0.81-1.30)         |

Data are hazard ratios (95% confidence intervals) unless otherwise indicated.

<sup>Δ</sup> CVD Composite was as composite of myocardial infarction, hospitalization for angina, stroke, and death for cardiovascular causes.

Model 1 adjusted for age, sex, race/ethnicity, and randomization arm. Model 2 includes variables in model 1 with further adjustment for body mass index, current smoking, alcohol drinking, use of antihypertensive medications, average ratio of total to high-density lipoprotein cholesterol, estimated glomerular filtration rate, duration of diabetes and average systolic blood pressure; Model 3 includes model 2 plus further adjustment for average HbA<sub>1C</sub>.

AHEAD indicates Action for Health in Diabetes; CVD, cardiovascular disease; HbA<sub>1C</sub>, hemoglobin A<sub>1C</sub>; Q, quartile; SD, standard deviation.

\* *P*<0.05, † *P*<0.01, ‡ *P*<0.001

**Table S4. Hazard Ratios for Clinical Outcomes by Average Successive Variability of HbA<sub>1C</sub> in the Look AHEAD Study**

| Outcome                         | Quartiles of Average Successive Variability of HbA <sub>1C</sub> , % |                    |                    |                  | <i>P</i> <sub>trend</sub> | Per SD           |
|---------------------------------|----------------------------------------------------------------------|--------------------|--------------------|------------------|---------------------------|------------------|
|                                 | Q1 (< -0.267)                                                        | Q2 (-0.267,-0.067) | Q3 (-0.067, 0.133) | Q4 (> 0.133)     |                           |                  |
| <b>All-Cause Mortality</b>      |                                                                      |                    |                    |                  |                           |                  |
| Model 1                         | Reference                                                            | 0.98 (0.64-1.50)   | 0.80 (0.51-1.27)   | 1.31 (0.86-2.00) | 0.387                     | 1.06 (0.89-1.26) |
| Model 2                         | Reference                                                            | 1.03 (0.67-1.59)   | 0.86 (0.54-1.37)   | 1.34 (0.87-2.06) | 0.328                     | 1.07 (0.90-1.27) |
| Model 3                         | Reference                                                            | 1.09 (0.70-1.69)   | 0.89 (0.56-1.43)   | 1.27 (0.82-1.97) | 0.454                     | 1.04 (0.88-1.22) |
| <b>Cardiovascular Mortality</b> |                                                                      |                    |                    |                  |                           |                  |
| Model 1                         | Reference                                                            | 0.91 (0.37-2.25)   | 0.33 (0.09-1.22)   | 1.45 (0.60-3.47) | 0.749                     | 1.17 (0.81-1.69) |
| Model 2                         | Reference                                                            | 1.07 (0.40-2.85)   | 0.43 (0.11-1.65)   | 1.49 (0.58-3.86) | 0.670                     | 1.21 (0.83-1.76) |
| Model 3                         | Reference                                                            | 1.14 (0.43-3.06)   | 0.46 (0.12-1.74)   | 1.38 (0.53-3.61) | 0.802                     | 1.14 (0.79-1.62) |
| <b>CVD Composite *</b>          |                                                                      |                    |                    |                  |                           |                  |
| Model 1                         | Reference                                                            | 1.09 (0.81-1.47)   | 0.90 (0.66-1.23)   | 1.18 (0.87-1.59) | 0.534                     | 1.10 (0.98-1.23) |
| Model 2                         | Reference                                                            | 1.14 (0.84-1.54)   | 0.93 (0.68-1.28)   | 1.06 (0.78-1.44) | 0.987                     | 1.06 (0.95-1.19) |
| Model 3                         | Reference                                                            | 1.21 (0.90-1.65)   | 0.99 (0.72-1.37)   | 1.00 (0.74-1.37) | 0.748                     | 1.03 (0.93-1.14) |
| <b>Heart Failure Event</b>      |                                                                      |                    |                    |                  |                           |                  |
| Model 1                         | Reference                                                            | 0.98 (0.51-1.88)   | 0.84 (0.42-1.65)   | 1.25 (0.66-2.36) | 0.622                     | 1.22 (0.97-1.55) |
| Model 2                         | Reference                                                            | 1.14 (0.59-2.20)   | 0.89 (0.44-1.79)   | 1.08 (0.56-2.09) | 0.980                     | 1.17 (0.93-1.47) |
| Model 3                         | Reference                                                            | 1.28 (0.66-2.48)   | 0.98 (0.49-1.97)   | 0.93 (0.48-1.81) | 0.706                     | 1.08 (0.87-1.33) |

Data are hazard ratios (95% confidence intervals) unless otherwise indicated.

\* CVD Composite was as composite of myocardial infarction, hospitalization for angina, stroke, and death for cardiovascular causes.

Model 1 adjusted for age, sex, race/ethnicity, and randomization arm. Model 2 includes variables in model 1 with further adjustment for body mass index, current smoking, alcohol drinking, use of antihypertensive medications, average ratio of total to high-density lipoprotein cholesterol, estimated glomerular filtration rate, duration of diabetes and average systolic blood pressure; Model 3 includes model 2 plus further adjustment for average HbA<sub>1C</sub>.

AHEAD indicates Action for Health in Diabetes; CVD, cardiovascular disease; HbA<sub>1C</sub>, hemoglobin A<sub>1C</sub>; Q, quartile; SD, standard deviation.

**Table S5. Hazard Ratios for Clinical Outcomes by Variability Independent of the Mean of Fasting Plasma Glucose in the Look AHEAD Study**

| Outcome                           | Quartiles of Variability Independent of the Mean of FPG, mg/dL |                  |                          |                          | <i>P</i> <sub>trend</sub> | Per SD                   |
|-----------------------------------|----------------------------------------------------------------|------------------|--------------------------|--------------------------|---------------------------|--------------------------|
|                                   | Q1 (< 0.05)                                                    | Q2 (0.05-0.08)   | Q3 (0.08-0.12)           | Q4 (> 0.12)              |                           |                          |
| <b>All-Cause Mortality</b>        |                                                                |                  |                          |                          |                           |                          |
| Model 1                           | Reference                                                      | 1.16 (0.72-1.90) | <b>1.77 (1.13-2.78)*</b> | <b>1.79 (1.14-2.82)*</b> | 0.003                     | <b>1.16 (1.03-1.31)*</b> |
| Model 2                           | Reference                                                      | 1.14 (0.70-1.85) | 1.58 (1.00-2.50)         | 1.53 (0.96-2.43)         | 0.035                     | 1.13 (0.99-1.29)         |
| <b>Cardiovascular Mortality</b>   |                                                                |                  |                          |                          |                           |                          |
| Model 1                           | Reference                                                      | 0.41 (0.13-1.30) | 0.52 (0.18-1.54)         | 1.49 (0.66-3.39)         | 0.257                     | <b>1.26 (1.03-1.55)*</b> |
| Model 2                           | Reference                                                      | 0.41 (0.13-1.33) | 0.30 (0.08-1.11)         | 1.25 (0.52-2.99)         | 0.612                     | 1.28 (0.99-1.66)         |
| <b>CVD Composite <sup>Δ</sup></b> |                                                                |                  |                          |                          |                           |                          |
| Model 1                           | Reference                                                      | 0.83 (0.61-1.13) | 0.98 (0.72-1.32)         | 1.09 (0.81-1.46)         | 0.391                     | 1.02 (0.92-1.13)         |
| Model 2                           | Reference                                                      | 0.84 (0.61-1.15) | 0.89 (0.65-1.21)         | 1.02 (0.75-1.39)         | 0.824                     | 1.00 (0.89-1.11)         |
| <b>Heart Failure Event</b>        |                                                                |                  |                          |                          |                           |                          |
| Model 1                           | Reference                                                      | 1.18 (0.56-2.47) | 1.50 (0.74-3.04)         | <b>2.01 (1.03-3.96)*</b> | 0.027                     | 1.14 (0.94-1.38)         |
| Model 2                           | Reference                                                      | 1.04 (0.49-2.21) | 1.17 (0.56-2.42)         | 1.61 (0.81-3.23)         | 0.144                     | 1.10 (0.89-1.37)         |

Data are hazard ratios (95% confidence intervals) unless otherwise indicated.

<sup>Δ</sup> CVD Composite was as composite of myocardial infarction, hospitalization for angina, stroke and death for cardiovascular causes.

Model 1 adjusted for age, sex, race/ethnicity, and randomization arm. Model 2 includes variables in model 1 with further adjustment for body mass index, current smoking, alcohol drinking, use of antihypertensive medications, average ratio of total to high-density lipoprotein cholesterol, estimated glomerular filtration rate, duration of diabetes and average systolic blood pressure.

AHEAD indicates Action for Health in Diabetes; CVD, cardiovascular disease; FPG, fasting plasma glucose; Q, quartile; SD, standard deviation.

\* *P*<0.05

**Table S6. Hazard Ratios for Clinical Outcomes by Coefficient of Variation of Fasting Plasma Glucose in the Look AHEAD Study**

| Outcome                           | Quartiles of Coefficient of Variation of Fasting Plasma Glucose, mg/dL |                  |                          |                          | <i>P</i> <sub>trend</sub> | Per SD                   |
|-----------------------------------|------------------------------------------------------------------------|------------------|--------------------------|--------------------------|---------------------------|--------------------------|
|                                   | Q1 (< 0.08)                                                            | Q2 (0.08-0.13)   | Q3 (0.13-0.20)           | Q4 (> 0.20)              |                           |                          |
| <b>All-Cause Mortality</b>        |                                                                        |                  |                          |                          |                           |                          |
| Model 1                           | Reference                                                              | 1.40 (0.86-2.28) | <b>1.82 (1.14-2.91)*</b> | <b>2.10 (1.33-3.32)†</b> | 0.001                     | <b>1.30 (1.13-1.49)‡</b> |
| Model 2                           | Reference                                                              | 1.33 (0.81-2.16) | <b>1.64 (1.02-2.64)*</b> | <b>1.75 (1.08-2.81)*</b> | 0.015                     | <b>1.23 (1.06-1.43)†</b> |
| Model 3                           | Reference                                                              | 1.30 (0.80-2.12) | 1.58 (0.98-2.55)         | 1.60 (0.98-2.63)         | 0.046                     | <b>1.20 (1.03-1.40)*</b> |
| <b>Cardiovascular Mortality</b>   |                                                                        |                  |                          |                          |                           |                          |
| Model 1                           | Reference                                                              | 1.55 (0.55-4.35) | 0.55 (0.14-2.21)         | <b>2.82 (1.09-7.32)*</b> | 0.060                     | <b>1.44 (1.09-1.90)*</b> |
| Model 2                           | Reference                                                              | 1.55 (0.54-4.48) | 0.35 (0.07-1.78)         | 2.15 (0.76-6.06)         | 0.289                     | 1.34 (0.98-1.84)         |
| Model 3                           | Reference                                                              | 1.51 (0.52-4.37) | 0.33 (0.06-1.70)         | 1.92 (0.65-5.69)         | 0.441                     | 1.30 (0.93-1.81)         |
| <b>CVD Composite <sup>Δ</sup></b> |                                                                        |                  |                          |                          |                           |                          |
| Model 1                           | Reference                                                              | 0.92 (0.68-1.26) | 1.02 (0.75-1.39)         | 1.28 (0.95-1.72)         | 0.075                     | <b>1.12 (1.01-1.24)*</b> |
| Model 2                           | Reference                                                              | 0.89 (0.65-1.23) | 0.92 (0.67-1.26)         | 1.09 (0.80-1.49)         | 0.552                     | 1.06 (0.95-1.19)         |
| Model 3                           | Reference                                                              | 0.86 (0.63-1.18) | 0.86 (0.63-1.19)         | 0.97 (0.70-1.34)         | 0.864                     | 1.02 (0.91-1.15)         |
| <b>Heart Failure Event</b>        |                                                                        |                  |                          |                          |                           |                          |
| Model 1                           | Reference                                                              | 0.94 (0.43-2.07) | 1.64 (0.81-3.30)         | <b>2.28 (1.17-4.43)*</b> | 0.004                     | <b>1.33 (1.10-1.62)†</b> |
| Model 2                           | Reference                                                              | 0.80 (0.36-1.80) | 1.28 (0.62-2.62)         | 1.68 (0.84-3.36)         | 0.061                     | 1.23 (0.99-1.52)         |
| Model 3                           | Reference                                                              | 0.77 (0.34-1.73) | 1.18 (0.57-2.43)         | 1.41 (0.68-2.90)         | 0.193                     | 1.16 (0.92-1.45)         |

Data are hazard ratios (95% confidence interval) unless otherwise indicated.

<sup>Δ</sup> CVD Composite was as composite of myocardial infarction, hospitalization for angina, stroke, and death for cardiovascular causes.

Model 1 adjusted for age, sex, race/ethnicity, and randomization arm. Model 2 includes variables in model 1 with further adjustment for body mass index, current smoking, alcohol drinking, use of antihypertensive medications, average ratio of total to high-density lipoprotein cholesterol, estimated glomerular filtration rate, duration of diabetes and average systolic blood pressure; Model 3 includes model 2 plus further adjustment for average fasting plasma glucose.

AHEAD indicates Action for Health in Diabetes; CVD, cardiovascular disease; Q, quartile; SD, standard deviation.

\* *P*<0.05, † *P*<0.01, ‡ *P*<0.001

**Table S7. Hazard Ratios for Clinical Outcomes by Average Successive Variability of Fasting Plasma Glucose in the Look AHEAD Study**

| Outcome                           | Quartiles of Average Successive Variability of Fasting Plasma Glucose, mg/dL |                    |                  |                  | <i>P</i> <sub>trend</sub> | Per SD           |
|-----------------------------------|------------------------------------------------------------------------------|--------------------|------------------|------------------|---------------------------|------------------|
|                                   | Q1 (< -10.67)                                                                | Q2 (-10.33, -2.67) | Q3 (-2.33, 4.67) | Q4 (> 5.00)      |                           |                  |
| <b>All-Cause Mortality</b>        |                                                                              |                    |                  |                  |                           |                  |
| Model 1                           | Reference                                                                    | 0.98 (0.65-1.49)   | 0.67 (0.42-1.08) | 1.24 (0.82-1.88) | 0.628                     | 1.06 (0.89-1.24) |
| Model 2                           | Reference                                                                    | 1.11 (0.72-1.72)   | 0.80 (0.49-1.31) | 1.31 (0.86-2.01) | 0.422                     | 1.07 (0.91-1.25) |
| Model 3                           | Reference                                                                    | 1.19 (0.77-1.86)   | 0.87 (0.53-1.43) | 1.31 (0.86-2.01) | 0.413                     | 1.06 (0.91-1.23) |
| <b>Cardiovascular Mortality</b>   |                                                                              |                    |                  |                  |                           |                  |
| Model 1                           | Reference                                                                    | 1.85 (0.69-4.94)   | 0.70 (0.20-2.48) | 2.10 (0.77-5.72) | 0.369                     | 1.19 (0.83-1.71) |
| Model 2                           | Reference                                                                    | 2.16 (0.73-6.39)   | 0.94 (0.25-3.55) | 2.18 (0.74-6.41) | 0.351                     | 1.17 (0.82-1.68) |
| Model 3                           | Reference                                                                    | 2.44 (0.81-7.37)   | 1.08 (0.28-4.20) | 2.17 (0.74-6.39) | 0.356                     | 1.15 (0.82-1.60) |
| <b>CVD Composite <sup>Δ</sup></b> |                                                                              |                    |                  |                  |                           |                  |
| Model 1                           | Reference                                                                    | 0.87 (0.65-1.17)   | 0.88 (0.66-1.19) | 0.83 (0.61-1.12) | 0.254                     | 0.92 (0.83-1.03) |
| Model 2                           | Reference                                                                    | 0.94 (0.70-1.28)   | 0.97 (0.72-1.31) | 0.78 (0.57-1.06) | 0.153                     | 0.91 (0.82-1.01) |
| Model 3                           | Reference                                                                    | 1.03 (0.76-1.39)   | 1.08 (0.79-1.47) | 0.77 (0.57-1.06) | 0.162                     | 0.91 (0.83-1.01) |
| <b>Heart Failure Event</b>        |                                                                              |                    |                  |                  |                           |                  |
| Model 1                           | Reference                                                                    | 0.58 (0.30-1.12)   | 0.57 (0.29-1.14) | 1.05 (0.58-1.89) | 0.930                     | 1.14 (0.90-1.45) |
| Model 2                           | Reference                                                                    | 0.75 (0.38-1.51)   | 0.75 (0.37-1.52) | 1.07 (0.58-1.98) | 0.831                     | 1.13 (0.90-1.42) |
| Model 3                           | Reference                                                                    | 0.85 (0.42-1.72)   | 0.86 (0.42-1.77) | 1.06 (0.57-1.95) | 0.867                     | 1.09 (0.89-1.35) |

Data are hazard ratios (95% confidence intervals) unless otherwise indicated.

<sup>Δ</sup> CVD Composite was as composite of myocardial infarction, hospitalization for angina, stroke and death for cardiovascular causes.

Model 1 adjusted for age, sex, race/ethnicity, and randomization arm. Model 2 includes variables in model 1 with further adjustment for body mass index, current smoking, alcohol drinking, use of antihypertensive medications, average ratio of total to high-density lipoprotein cholesterol, estimated glomerular filtration rate, duration of diabetes and average systolic blood pressure; Model 3 includes model 2 plus further adjustment for average fasting plasma glucose.

AHEAD indicates Action for Health in Diabetes; CVD, cardiovascular disease; Q, quartile; SD, standard deviation.

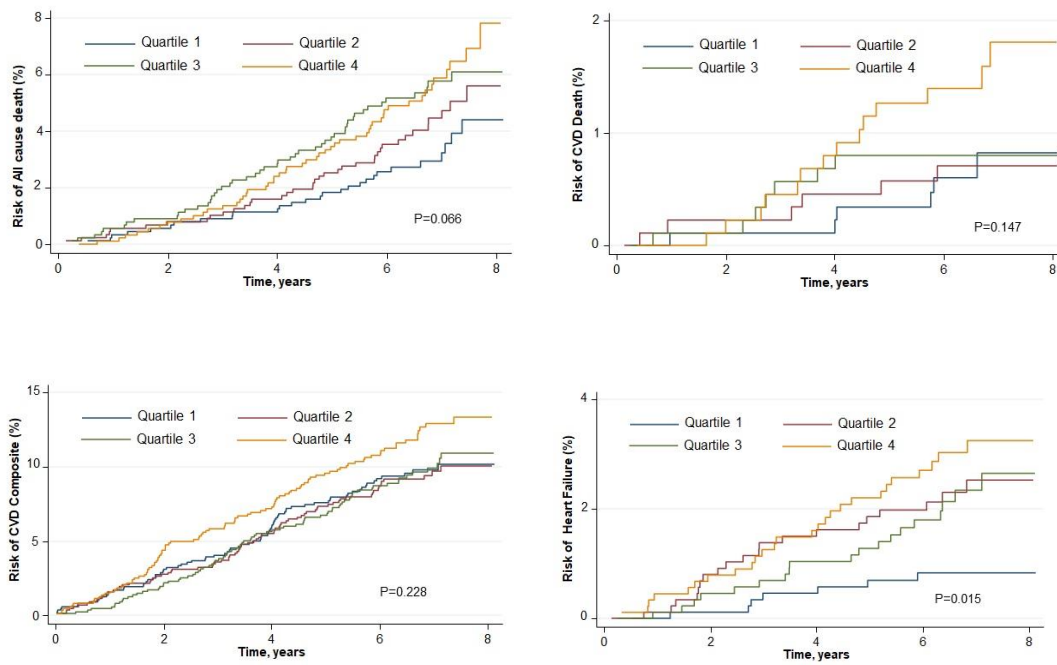

**Figure S1. Risk of Clinical Outcomes by Quartile of SD of Fasting Plasma Glucose.**

CVD Composite was as composite of myocardial infarction, stroke, hospitalization for angina and death for cardiovascular causes. CVD indicates cardiovascular disease and SD, standard deviation.
